# Supplementary material for: Non-HLA Antibodies in Hand Transplant Recipients Are Connected to Multiple Acute Rejection Episodes and Endothelial Activation
Source: MDPI journal article supplement (doi:10.3390/jcm11030833), 2022-02-04
Supplement: s1 [file s1]

**Supplementary Table S1. HLA typing results for kidney recipients and donors.**

| <b>Patient Number</b> | <b>Donor HLA</b>         | <b>Recipient HLA</b>      | <b>AT1R-Ab Units/mL</b> | <b>ETAR-Ab Units/mL</b> | <b>PAR1-Ab Units/mL</b> | <b>VEGF-A-Ab Units/mL</b> |
|-----------------------|--------------------------|---------------------------|-------------------------|-------------------------|-------------------------|---------------------------|
| 1                     | A 3,30 B 7,35, DR 11,15  | A2,25, B 18,40, DR 11,15  | 7,3                     | 6,6                     | 1,3                     | 1,2                       |
| 2                     | A 1,2, B 37,44, DR 11,15 | A 24,68 B 38,44, DR 4,11  | 9,7                     | 7,7                     | 9,0                     | 7,4                       |
| 3                     | A3,3, B 7,56, DR 11,13   | A 2,31, B 15,39, DR 12,13 | 9,8                     | 10,7                    | 5,9                     | 4,8                       |
| 4                     | A 3,30, B 7,35, DR 11,15 | A 1,26, B 35,38, DR 11,15 | 17,9                    | 15,0                    | 4,9                     | 5,4                       |
| 5                     | NA                       | NA                        | 12,4                    | 13,2                    | 20,6                    | 6,3                       |
| 6                     | A 2,3 B 5,6 DR 1,6       | A 1,2 B 15,37, DR 4,6     | 9,6                     | 10,8                    | 2,5                     | 3,1                       |
| 7                     | A 2,32, B 13,18, DR 9,13 | A 1,33, B 14,37, DR 1,10  | 7,6                     | 8,0                     | 1,8                     | 2,9                       |
| 8                     | NA                       | NA                        | 9,7                     | 8,4                     | 2,6                     | 3,8                       |
| 9                     | A 3,10, B 5,6, DR 1,6    | A 2,2 B 14,15, DR 1,6     | 12,2                    | 15,4                    | 13,7                    | 4,5                       |
| 10                    | A 3,26, B 8,35, DR 12,17 | A 1,21, B 8,41, DR 11, 17 | 9,0                     | 8,6                     | 4,1                     | 2,8                       |
| 11                    | A 1,2, B 18,44, DR 7,16  | A 1,2, B 44,50, DR 1,7    | 11,1                    | 13,5                    | 12,6                    | 5,5                       |
| 12                    | NA                       | NA                        | 8,3                     | 8,1                     | 7,6                     | 6,1                       |

NA—No data for patients who had a transplant before 2006, no database in the system.
